# Supplementary material for: Analysis of genetic admixture in Uyghur using the 26 Y-STR loci system
Source: PubMed Central journal article supplement (PMC4740765; doi:10.1038/srep19998), 2016-02-04
Supplement: srep19998-s1.pdf [file srep19998-s1.pdf]

## Supplementary Table S1 and Supplementary Figure S1

### Analysis of genetic admixture in Uyghur using the 26 Y-STR loci system

Yingnan Bian<sup>1a</sup>, Shuhua Zhang<sup>1,2a</sup>, Wei Zhou<sup>3a</sup>, Siqintuya<sup>4</sup>, Zhao Qi<sup>1,5</sup>, Ruxin Zhu<sup>1</sup>, Zheng Wang<sup>1</sup>, Yuzhen Gao<sup>5</sup>, Jie Hong<sup>6</sup>, Daru Lu<sup>2</sup>, Chengtao Li<sup>1\*</sup>

1. Shanghai Key Laboratory of Forensic Medicine, Institute of Forensic Sciences, Ministry of Justice, P.R. China, Shanghai 200063, China

2. State Key Laboratory of Genetic Engineering, Institute of Genetics, School of Life Sciences, Fudan University, Shanghai 200433, China

3. University of Pennsylvania, 3451 Walnut Street, Philadelphia, PA 19104, United States

4. Shihezi City Public Security Bureau Traffic Institute of Science and Technology, Xinjiang 832000, China

4. State Key Laboratory of Genetic Engineering, Institute of Genetics, School of Life Science, Fudan University, Shanghai 200433, China

5. Department of Forensic Medicine, Medical College of Soochow University, Suzhou 215123, China

6. Division of Gastroenterology and Hepatology, Renji Hospital, Shanghai Institution of Digestive Disease; Key Laboratory of Gastroenterology and Hepatology, Ministry of Health; State Key Laboratory of Oncogene and Related Genes, Shanghai Jiao-Tong University School of Medicine, Shanghai 200001, China

a. These authors contributed equally to this work.

\* Correspondence and requests for materials should be addressed to Chengtao Li ([lichengtaohla@163.com](mailto:lichengtaohla@163.com))

Supplementary Table S1. Haplotypes for 26 Y-STR loci detected in 100 unrelated males of Uygur from southern Xinjiang, China.

| ID | Population              | DYS19 | DYS389I | DYS389II | DYS390 | DYS391 | DYS392 | DYS393 | DYS385ab | DYS437 | DYS438 | DYS439 | DYS448 | DYS456 | DYS458 | DYS635 | Y  | GATA | H4 | DYS576 | DYS570 | DYS481 | DYS533 | DYS549 | DYS643 | DYS460 | DYS449 | DYS388 |
|----|-------------------------|-------|---------|----------|--------|--------|--------|--------|----------|--------|--------|--------|--------|--------|--------|--------|----|------|----|--------|--------|--------|--------|--------|--------|--------|--------|--------|
| 1  | Xinjiang, China[Uyghur] | 13    | 12      | 30       | 25     | 11     | 13     | 14     | 13,20    | 15     | 10     | 11     | 19     | 15     | 16     | 22     | 13 | 19   | 17 | 23     | 11     | 14     | 9      | 9      | 27     | 12     |        |        |
| 2  | Xinjiang, China[Uyghur] | 15    | 12      | 28       | 25     | 11     | 11     | 13     | 11,14    | 14     | 11     | 10     | 20     | 14     | 15     | 23     | 13 | 18   | 17 | 23     | 12     | 12     | 10     | 11     | 33     | 12     |        |        |
| 3  | Xinjiang, China[Uyghur] | 15    | 13      | 29       | 24     | 10     | 11     | 13     | 12,14    | 14     | 11     | 12     | 16     | 17     | 17     | 21     | 11 | 17   | 20 | 27     | 11     | 12     | 10     | 9      | 25     | 13     |        |        |
| 4  | Xinjiang, China[Uyghur] | 14    | 14      | 31       | 23     | 11     | 14     | 12     | 11,12    | 14     | 10     | 10     | 18     | 14     | 18     | 20     | 11 | 17   | 18 | 21     | 12     | 12     | 12     | 10     | 32     | 12     |        |        |
| 5  | Xinjiang, China[Uyghur] | 14    | 12      | 28       | 24     | 10     | 11     | 12     | 14,17    | 15     | 9      | 11     | 21     | 15     | 16     | 21     | 11 | 18   | 16 | 24     | 13     | 12     | 11     | 32     | 15     |        |        |        |
| 6  | Xinjiang, China[Uyghur] | 17    | 12      | 28       | 24     | 10     | 13     | 12     | 14,19    | 15     | 10     | 13     | 20     | 15     | 21     | 21     | 11 | 18   | 20 | 26     | 11     | 12     | 11     | 10     | 31     | 12     |        |        |
| 7  | Xinjiang, China[Uyghur] | 17    | 12      | 27       | 23     | 10     | 13     | 12     | 12,17    | 15     | 10     | 12     | 19     | 14     | 18     | 21     | 11 | 18   | 16 | 24     | 12     | 14     | 12     | 9      | 30     | 12     |        |        |
| 8  | Xinjiang, China[Uyghur] | 14    | 13      | 29       | 24     | 10     | 14     | 12     | 11,14    | 15     | 12     | 12     | 18     | 15     | 14     | 23     | 12 | 18   | 13 | 22     | 11     | 13     | 10     | 10     | 29     | 12     |        |        |
| 9  | Xinjiang, China[Uyghur] | 16,17 | 14      | 31       | 23     | 9      | 11     | 13     | 12       | 14     | 10     | 11     | 20     | 15     | 18     | 24     | 10 | 19   | 17 | 27     | 11     | 12     | 9      | 11     | 32     | 12     |        |        |
| 10 | Xinjiang, China[Uyghur] | 16    | 14      | 30       | 24     | 10     | 11     | 13     | 11,14    | 14     | 11     | 10     | 20     | 15     | 16     | 23     | 13 | 18   | 21 | 24     | 12     | 12     | 10     | 11     | 31     | 12     |        |        |
| 11 | Xinjiang, China[Uyghur] | 15    | 12      | 29       | 23     | 10     | 13     | 12     | 12,17    | 15     | 10     | 11     | 19     | 15     | 16     | 19     | 12 | 19   | 17 | 22     | 11     | 14     | 12     | 9      | 32     | 12     |        |        |
| 12 | Xinjiang, China[Uyghur] | 13    | 14      | 30       | 24     | 9      | 14     | 14     | 15,22    | 14     | 12     | 10     | 19     | 15     | 15     | 22     | 10 | 19   | 18 | 23     | 12     | 12     | 10     | 10     | 31     | 12     |        |        |
| 13 | Xinjiang, China[Uyghur] | 14    | 13      | 29       | 24     | 10     | 11     | 12     | 13,16    | 15     | 10     | 11     | 19     | 15     | 20     | 21     | 11 | 17   | 18 | 23     | 12     | 13     | 9      | 11     | 30     | 14     |        |        |
| 14 | Xinjiang, China[Uyghur] | 16    | 13      | 31       | 24     | 10     | 13     | 12     | 13,17    | 15     | 9      | 10     | 19     | 15     | 16     | 21     | 13 | 18   | 14 | 25     | 12     | 15     | 9      | 9      | 32     | 12     |        |        |
| 15 | Xinjiang, China[Uyghur] | 15    | 12      | 29       | 23     | 10     | 11     | 14     | 13,14    | 16     | 10     | 11     | 20     | 17     | 17     | 21     | 12 | 16   | 17 | 21     | 9      | 12     | 11     | 10     | 29     | 12     |        |        |
| 16 | Xinjiang, China[Uyghur] | 15    | 14      | 32       | 25     | 10     | 11     | 13     | 11,14    | 14     | 11     | 10     | 20     | 16     | 15     | 23     | 13 | 18   | 19 | 24     | 12     | 13     | 10     | 11     | 31     | 12     |        |        |
| 17 | Xinjiang, China[Uyghur] | 15    | 14      | 30       | 25     | 11     | 13     | 12     | 12,17    | 15     | 10     | 12     | 19     | 14     | 17     | 24     | 14 | 19   | 19 | 24     | 11     | 12     | 10     | 10     | 31     | 12     |        |        |
| 18 | Xinjiang, China[Uyghur] | 14    | 14      | 30       | 19     | 11     | 13     | 13     | 13       | 15     | 10     | 13     | 19     | 15     | 18     | 24     | 11 | 16   | 17 | 24     | 13     | 12     | 8      | 10     | 32     | 12     |        |        |
| 19 | Xinjiang, China[Uyghur] | 15    | 13      | 32       | 25     | 10     | 11     | 13     | 11,14    | 14     | 11     | 12     | 20     | 16     | 15     | 23     | 12 | 18   | 18 | 25     | 11     | 12     | 10     | 11     | 33     | 12     |        |        |
| 20 | Xinjiang, China[Uyghur] | 14    | 13      | 31       | 23     | 10     | 14     | 14     | 11,13    | 14     | 10     | 10     | 19     | 15     | 18     | 22     | 12 | 18   | 20 | 20     | 11     | 11     | 11     | 10     | 30     | 12     |        |        |
| 21 | Xinjiang, China[Uyghur] | 15    | 14      | 30       | 25     | 11     | 11     | 13     | 11,13    | 14     | 11     | 10     | 20     | 16     | 14     | 23     | 12 | 17   | 19 | 23     | 12     | 12     | 10     | 10     | 34     | 12     |        |        |
| 22 | Xinjiang, China[Uyghur] | 13    | 13      | 32       | 25     | 11     | 11     | 13     | 15,17    | 14     | 10     | 13     | 20     | 16     | 19     | 22     | 11 | 16   | 18 | 25     | 10     | 12     | 11     | 10     | 31     | 12     |        |        |
| 23 | Xinjiang, China[Uyghur] | 15    | 13      | 30       | 25     | 11     | 11     | 13     | 11,15    | 14     | 11     | 10     | 20     | 15     | 15     | 23     | 12 | 12   | 13 | 10     | 11     | 33     | 12     |        |        |        |        |        |
| 24 | Xinjiang, China[Uyghur] | 16    | 13      | 30       | 24     | 11     | 11     | 13     | 11,20    | 14     | 11     | 10     | 20     | 14     | 15     | 23     | 13 | 16   | 19 | 23     | 12     | 10     | 12     | 30     | 12     |        |        |        |
| 25 | Xinjiang, China[Uyghur] | 14    | 13      | 28       | 25     | 10     | 13     | 12     | 13,20    | 15     | 11     | 12     | 20     | 15     | 18     | 20     | 12 | 18   | 18 | 23     | 11     | 13     | 12     | 9      | 32     | 10     |        |        |
| 26 | Xinjiang, China[Uyghur] | 15    | 12      | 29       | 23     | 10     | 12     | 13     | 12,17    | 14     | 10     | 12     | 18     | 16     | 18     | 19     | 13 | 19   | 16 | 22     | 13     | 13     | 11     | 9      | 32     | 12     |        |        |
| 27 | Xinjiang, China[Uyghur] | 16    | 13      | 28       | 23     | 10     | 14     | 12     | 13,17    | 14     | 10     | 12     | 20     | 15     | 17     | 21     | 11 | 17   | 17 | 25     | 11     | 12     | 10     | 10     | 31     | 12     |        |        |
| 28 | Xinjiang, China[Uyghur] | 14    | 14      | 30       | 23     | 10     | 15     | 14     | 11,13    | 14     | 10     | 10     | 19     | 13     | 17     | 21     | 13 | 16   | 19 | 20     | 10     | 11     | 11     | 29     | 12     |        |        |        |
| 29 | Xinjiang, China[Uyghur] | 15    | 13      | 30       | 25     | 10     | 11     | 13     | 12,14    | 14     | 11     | 10     | 20     | 15     | 16     | 23     | 11 | 19   | 20 | 23     | 12     | 13     | 10     | 11     | 32     | 12     |        |        |
| 30 | Xinjiang, China[Uyghur] | 15    | 14      | 30       | 25     | 10     | 7      | 13     | 11       | 14     | 11     | 13     | 19     | 15     | 17     | 21     | 11 | 18   | 19 | 26     | 12     | 14     | 11     | 10     | 32     | 12     |        |        |
| 31 | Xinjiang, China[Uyghur] | 13    | 13      | 31       | 24     | 10     | 14     | 13     | 14,17    | 14     | 11     | 12     | 18     | 15     | 18     | 22     | 11 | 19   | 17 | 24     | 12     | 13     | 10     | 10     | 29     | 12     |        |        |
| 32 | Xinjiang, China[Uyghur] | 16    | 13      | 29       | 23     | 10     | 11     | 15     | 11,18    | 14     | 10     | 11     | 21     | 15     | 16     | 22     | 11 | 17   | 17 | 22     | 14     | 13     | 9      | 11     | 30     | 14     |        |        |
| 33 | Xinjiang, China[Uyghur] | 15    | 13      | 30       | 24     | 9      | 11     | 13     | 12       | 14     | 10     | 11     | 20     | 14     | 19     | 23     | 10 | 19   | 17 | 27     | 11     | 12     | 9      | 11     | 32     | 13     |        |        |
| 34 | Xinjiang, China[Uyghur] | 14    | 13      | 29       | 24     | 11     | 13     | 12     | 11,15    | 15     | 12     | 13     | 19     | 15     | 18     | 23     | 12 | 17   | 18 | 22     | 12     | 13     | 10     | 10     | 28     | 12     |        |        |
| 35 | Xinjiang, China[Uyghur] | 14    | 13      | 29       | 23     | 11     | 13     | 12     | 12,13    | 14     | 12     | 12     | 19     | 16     | 15     | 23     | 13 | 17   | 17 | 21     | 12     | 12     | 10     | 11     | 29,30  | 12     |        |        |
| 36 | Xinjiang, China[Uyghur] | 14    | 14      | 30       | 24     | 10     | 11     | 12     | 13,16    | 15     | 10     | 11     | 19     | 15     | 19     | 21     | 11 | 17   | 19 | 23     | 12     | 14     | 9      | 11     | 29     | 14     |        |        |
| 37 | Xinjiang, China[Uyghur] | 15    | 13      | 29       | 23     | 10     | 11     | 15     | 13,17    | 14     | 10     | 11     | 21     | 15     | 16     | 21     | 11 | 17   | 17 | 26     | 12     | 13     | 8      | 10     | 32     | 13     |        |        |
| 38 | Xinjiang, China[Uyghur] | 14    | 13      | 30       | 25     | 10     | 14     | 12     | 13,21    | 15     | 10     | 12     | 19     | 15     | 18     | 23     | 11 | 14   | 17 | 24     | 10     | 13     | 10     | 9      | 33     | 12     |        |        |
| 39 | Xinjiang, China[Uyghur] | 14    | 13      | 29       | 23     | 10     | 11     | 12     | 13,16    | 15     | 10     | 11     | 19     | 15     | 20     | 21     | 11 | 17   | 18 | 23     | 12     | 14     | 9      | 11     | 29     | 14     |        |        |
| 40 | Xinjiang, China[Uyghur] | 15    | 12      | 28       | 23     | 11     | 12     | 12     | 12,16    | 15     | 10     | 12     | 19     | 16     | 20     | 20     | 12 | 18   | 17 | 22     | 11     | 13     | 11     | 10     | 33     | 12     |        |        |
| 41 | Xinjiang, China[Uyghur] | 15    | 13      | 30       | 25     | 11     | 11     | 13     | 11,14    | 14     | 11     | 10     | 20     | 17     | 15     | 23     | 12 | 17   | 20 | 23     | 12     | 11     | 10     | 11     | 32     | 12     |        |        |
| 42 | Xinjiang, China[Uyghur] | 14    | 14      | 29       | 19     | 11     | 13     | 13     | 13       | 15     | 10     | 12     | 19     | 15     | 17     | 24     | 11 | 16   | 17 | 24     | 13     | 12     | 8      | 10     | 33     | 12     |        |        |
| 43 | Xinjiang, China[Uyghur] | 17    | 12      | 28       | 24     | 10     | 13     | 12     | 14,20    | 15     | 10     | 12     | 20     | 15     | 18     | 22     | 11 | 18   | 19 | 26     | 12     | 12     | 11     | 10     | 32     | 12     |        |        |
| 44 | Xinjiang, China[Uyghur] | 16    | 14      | 30       | 24     | 10     | 14     | 13     | 11,13    | 14     | 11     | 11     | 19     | 17     | 15     | 24     | 12 | 17   | 20 | 25     | 13     | 13     | 13     | 10     | 30     | 12     |        |        |
| 45 | Xinjiang, China[Uyghur] | 15    | 13      | 29       | 22     | 10     | 14     | 12     | 9,16     | 16     | 10     | 13     | 20     | 15     | 17     | 22     | 11 | 15   | 15 | 24     | 12     | 11     | 11     | 11     | 31     | 12     |        |        |
| 46 | Xinjiang, China[Uyghur] | 15    | 14      | 30       | 23     | 11     | 11     | 13     | 14,16    | 16     | 10     | 11     | 22     | 15     | 18     | 23     | 12 | 17   | 16 | 19     | 11     | 12     | 12     | 11     | 27     | 12     |        |        |
| 47 | Xinjiang, China[Uyghur] | 15    | 13      | 31       | 25     | 11     | 11     | 13     | 11,15    | 14     | 11     | 10     | 20     | 16     | 15     | 23     | 13 | 18   | 19 | 23     | 11     | 12     | 10     | 12     | 32     | 12     |        |        |
| 48 | Xinjiang, China[Uyghur] | 13    | 14      | 31       | 23     | 11     | 16     | 13     | 14,15    | 14     | 11     | 12     | 21     | 15     | 18     | 22     | 11 | 17   | 20 | 25     | 11     | 11     | 10     | 11     | 26     | 12     |        |        |
| 49 | Xinjiang, China[Uyghur] | 15    | 14      | 31       | 23     | 10     | 11     | 13     | 14,17    | 16     | 10     | 12     | 21     | 18     | 16     | 21     | 10 | 16   | 18 | 20     | 10     | 12     | 12     | 11     | 28     | 12     |        |        |
| 50 | Xinjiang, China[Uyghur] | 15    | 13      | 29       | 22     | 11     | 15     | 12     | 9,16     | 16     | 10     | 12     | 19     | 15     | 19     | 22     | 12 | 17   | 16 | 24     | 12     | 12     | 11     | 10     | 29     | 12     |        |        |
| 51 | Xinjiang, China[Uyghur] | 16    | 12      | 27       | 22     | 11     | 11     | 12     | 12,16    | 15     | 9      | 12     | 20     | 15     | 15     | 21     | 12 | 15   | 16 | 22     | 11     | 13     | 11     | 10     | 31     | 15     |        |        |
| 52 | Xinjiang, China[Uyghur] | 15    | 14      | 29       | 23     | 10     | 11     | 14     | 11,18    | 14     | 10     | 12     | 21     | 15     | 17     | 20     | 11 | 18   | 16 | 25     | 12     | 12     | 9      | 10     | 29     | 12     |        |        |
| 53 | Xinjiang, China[Uyghur] | 15    | 14      | 32       | 26     | 11     | 11     | 13     | 11,15    | 14     | 11     | 10     | 20     | 16     | 16     | 23     | 13 | 18   | 18 | 24     | 12     | 13     | 10     | 11     | 33     | 12     |        |        |
| 54 | Xinjiang, China[Uyghur] | 15    | 14      | 31       | 25     | 10     | 11     | 13     | 11,14    | 14     | 11     | 10     | 20     | 15     | 16     | 23     | 12 | 20   | 16 | 24     | 12     | 12     | 10     | 11     | 32     | 12     |        |        |
| 55 | Xinjiang, China[Uyghur] | 15    | 13      | 29       | 26     | 10     | 11     | 13     | 11,15    | 14     | 11     | 11     | 20     | 18     | 15     | 23     | 12 | 17   | 19 | 24     | 12     | 10     | 10     | 11     | 31     | 12     |        |        |
| 56 | Xinjiang, China[Uyghur] | 15    | 13      | 29       | 24     | 10     | 13     | 12     | 12,20    | 15     | 11     | 13     | 20     | 15     | 15     | 21     | 11 | 18   | 18 | 24     | 11     | 12     | 11     | 9      | 33     | 10     |        |        |
| 57 | Xinjiang, China[Uyghur] | 15    | 14      | 30       | 23     | 10     | 14     | 13     | 13       | 14     | 10     | 11     | 18     | 17     | 15     | 19     | 12 | 17   | 20 | 25     | 11     | 12     | 11     | 10     | 31     | 12     |        |        |
| 58 | Xinjiang, China[Uyghur] | 13    | 13      | 30       | 23     | 10     | 14     | 13     | 15,16    | 13     | 12     | 14     | 19     | 15     | 16     | 22     | 11 | 20   | 19 | 25     | 11     | 11     | 11     | 10     | 30     | 12     |        |        |
| 59 | Xinjiang, China[Uyghur] | 14    | 12      | 28       | 23     | 10     | 11     | 13     | 14       | 16     | 10     | 11     | 21     | 14     | 15     | 22     | 11 | 18   | 21 | 25     | 12     | 13     | 12     | 10     | 28     | 14     |        |        |

Supplementary Table S1. Haplotypes for 26 Y-STR loci detected in 100 unrelated males of Uygur from southern Xinjiang, China. (Continued)

| ID  | Population              | DYS19 | DYS389I | DYS389II | DYS390 | DYS391 | DYS392 | DYS393 | DYS385ab | DYS437 | DYS438 | DYS439 | DYS448 | DYS456 | DYS458 | DYS635 | Y  | GATA_H4 | DYS576 | DYS570 | DYS481 | DYS533 | DYS549 | DYS643 | DYS460 | DYS449 | DYS388 |
|-----|-------------------------|-------|---------|----------|--------|--------|--------|--------|----------|--------|--------|--------|--------|--------|--------|--------|----|---------|--------|--------|--------|--------|--------|--------|--------|--------|--------|
| 60  | Xinjiang, China[Uyghur] | 13    | 14      | 30       | 22     | 10     | 15     | 13     | 11,18    | 14     | 11     | 14     | 18     | 15     | 17     | 22     | 10 | 20      | 16     | 25     | 10     | 14     | 12     | 11     | 27     | 12     |        |
| 61  | Xinjiang, China[Uyghur] | 17    | 14      | 31       | 25     | 11     | 11     | 13     | 11,14    | 14     | 11     | 11     | 20     | 15     | 16     | 23     | 12 | 18      | 18     | 23     | 13     | 12     | 10     | 11     | 31     | 12     |        |
| 62  | Xinjiang, China[Uyghur] | 17    | 13      | 31       | 25     | 10     | 11     | 14     | 11,14    | 14     | 11     | 10     | 20     | 15     | 14     | 23     | 13 | 19      | 19     | 25     | 12     | 12     | 10     | 11     | 33     | 12     |        |
| 63  | Xinjiang, China[Uyghur] | 14    | 13      | 29       | 22     | 11     | 14     | 11     | 13,17    | 15     | 11     | 13     | 19     | 16     | 15     | 22     | 12 | 16      | 16     | 23     | 12     | 12     | 10     | 10     | 27     | 13     |        |
| 64  | Xinjiang, China[Uyghur] | 15    | 14      | 30       | 25     | 10     | 7      | 13     | 11       | 14     | 11     | 12     | 19     | 15     | 17     | 21     | 11 | 19      | 19     | 26     | 12     | 13     | 11     | 11     | 32     | 12     |        |
| 65  | Xinjiang, China[Uyghur] | 15    | 13      | 32       | 24     | 10     | 11     | 13     | 11,14    | 14     | 11     | 10     | 20     | 16     | 15     | 23     | 12 | 17      | 19     | 23     | 12     | 12     | 10     | 11     | 32     | 12     |        |
| 66  | Xinjiang, China[Uyghur] | 14    | 13      | 30       | 20     | 10     | 13     | 13     | 12,14    | 15     | 12     | 12     | 19     | 15     | 14     | 27     | 11 | 18      | 17     | 23     | 13     | 12     | 11     | 11     | 32     | 12     |        |
| 67  | Xinjiang, China[Uyghur] | 15    | 14      | 31       | 25     | 10     | 11     | 13     | 11,14    | 14     | 11     | 10     | 20     | 16     | 16     | 24     | 12 | 18      | 21     | 24     | 12     | 12     | 10     | 11     | 33     | 12     |        |
| 68  | Xinjiang, China[Uyghur] | 15    | 12      | 29       | 23     | 10     | 13     | 12     | 12,17    | 14     | 10     | 12     | 19     | 16     | 16     | 19     | 11 | 18      | 18     | 24     | 11     | 13     | 11     | 9      | 34     | 12     |        |
| 69  | Xinjiang, China[Uyghur] | 14    | 12      | 29       | 24     | 11     | 11     | 12     | 14,15    | 14     | 9      | 12     | 19     | 14     | 16     | 22     | 12 | 18      | 17     | 23     | 11     | 12     | 10     | 11     | 29     | 14     |        |
| 70  | Xinjiang, China[Uyghur] | 17    | 13      | 31       | 24     | 11     | 11     | 13     | 11,14    | 14     | 11     | 10     | 20     | 15     | 17     | 23     | 13 | 16      | 19     | 24     | 12     | 13     | 10     | 11     | 30     | 12     |        |
| 71  | Xinjiang, China[Uyghur] | 15    | 14      | 29       | 23     | 10     | 10     | 14     | 13,16    | 15     | 11     | 10     | 19     | 14     | 17     | 26     | 12 | 19      | 16     | 25     | 11     | 13     | 10     | 10     | 32     | 12     |        |
| 72  | Xinjiang, China[Uyghur] | 15    | 14      | 32       | 24     | 11     | 11     | 13     | 11,15    | 14     | 11     | 10     | 20     | 15     | 15     | 23     | 13 | 19      | 19     | 23     | 12     | 12     | 10     | 11     | 30     | 12     |        |
| 73  | Xinjiang, China[Uyghur] | 15    | 12      | 29       | 23     | 10     | 13     | 12     | 13,18    | 15     | 10     | 12     | 19     | 15     | 17     | 19     | 12 | 18      | 17     | 22     | 10     | 12     | 14     | 9      | 35     | 12     |        |
| 74  | Xinjiang, China[Uyghur] | 14    | 13      | 29       | 24     | 10     | 11     | 12     | 13,16    | 15     | 10     | 11     | 19     | 15     | 20     | 21     | 11 | 18      | 19     | 23     | 12     | 13     | 9      | 11     | 31     | 14     |        |
| 75  | Xinjiang, China[Uyghur] | 15    | 14      | 31       | 25     | 10     | 7      | 13     | 11       | 14     | 11     | 12     | 19     | 15     | 17     | 21     | 11 | 18      | 19     | 26     | 11     | 13     | 11     | 11     | 31     | 12     |        |
| 76  | Xinjiang, China[Uyghur] | 15    | 13      | 30       | 26     | 11     | 11     | 13     | 11       | 14     | 11     | 10     | 20     | 16     | 15     | 24     | 13 | 18      | 18     | 23     | 12     | 12     | 10     | 12     | 35     | 12     |        |
| 77  | Xinjiang, China[Uyghur] | 14    | 13      | 31       | 23     | 10     | 14     | 14     | 11,13    | 14     | 10     | 10     | 19     | 14     | 17     | 22     | 12 | 17      | 20     | 20     | 12     | 11     | 11     | 11     | 30     | 12     |        |
| 78  | Xinjiang, China[Uyghur] | 14    | 14      | 31       | 23     | 10     | 11     | 12     | 14,19    | 15     | 9      | 12     | 20     | 16     | 15     | 21     | 12 | 18      | 16     | 22     | 11     | 11     | 10     | 11     | 31     | 16     |        |
| 79  | Xinjiang, China[Uyghur] | 15    | 13      | 32       | 24     | 11     | 11     | 13     | 11,14    | 14     | 11     | 10     | 20     | 15     | 15     | 23     | 12 | 17      | 20     | 23     | 12     | 12     | 10     | 11     | 34     | 12     |        |
| 80  | Xinjiang, China[Uyghur] | 16    | 13      | 30       | 24     | 11     | 11     | 12     | 11,15    | 14     | 11     | 10     | 20     | 16     | 15     | 23     | 12 | 18      | 19     | 22     | 12     | 12     | 10     | 12     | 32     | 12     |        |
| 81  | Xinjiang, China[Uyghur] | 15    | 13      | 30       | 24     | 10     | 13     | 12     | 13,18    | 15     | 9      | 10     | 19     | 15     | 15     | 21     | 13 | 19      | 14     | 25     | 12     | 15     | 9      | 9      | 32     | 12     |        |
| 82  | Xinjiang, China[Uyghur] | 13    | 15      | 32       | 23     | 11     | 16     | 13     | 14,15    | 14     | 11     | 12     | 21     | 16     | 18     | 22     | 11 | 17      | 19     | 25     | 11     | 12     | 10     | 11     | 26     | 12     |        |
| 83  | Xinjiang, China[Uyghur] | 15    | 14      | 30       | 19     | 11     | 13     | 13     | 13,14    | 15     | 10     | 13     | 19     | 15     | 17     | 24     | 11 | 16      | 17     | 24     | 12     | 12     | 8      | 10     | 33     | 12     |        |
| 84  | Xinjiang, China[Uyghur] | 14    | 13      | 29       | 25     | 11     | 13     | 12     | 14       | 15     | 12     | 13     | 19     | 16     | 16     | 23     | 12 | 17      | 16     | 23     | 12     | 13     | 9      | 11     | 31     | 12     |        |
| 85  | Xinjiang, China[Uyghur] | 14    | 14      | 30       | 23     | 11     | 10     | 13     | 14,18    | 16     | 11     | 11     | 19     | 15     | 15     | 24     | 13 | 16      | 17     | 25     | 10     | 13     | 10     | 12     | 32     | 12     |        |
| 86  | Xinjiang, China[Uyghur] | 16    | 14      | 31       | 25     | 11     | 11     | 13     | 11,14    | 14     | 12     | 10     | 21     | 16     | 15     | 23     | 10 | 18      | 17     | 24     | 13     | 12     | 10     | 11     | 32     | 12     |        |
| 87  | Xinjiang, China[Uyghur] | 16    | 14      | 30       | 25     | 10     | 7      | 13     | 11       | 14     | 11     | 12     | 19     | 16     | 16     | 21     | 11 | 19      | 18     | 25     | 11     | 13     | 11     | 11     | 30     | 12     |        |
| 88  | Xinjiang, China[Uyghur] | 14    | 14      | 32       | 23     | 10     | 13     | 13     | 14,16    | 14     | 9      | 11     | 19     | 17     | 17     | 21     | 11 | 16      | 17     | 22     | 12     | 14     | 10     | 10     | 31     | 12     |        |
| 89  | Xinjiang, China[Uyghur] | 15    | 13      | 29       | 24     | 10     | 11     | 13     | 12,15    | 14     | 11     | 12     |        | 14     | 18     | 21     | 11 | 17      | 24     | 28     | 12     | 12     | 10     | 9      | 29     | 13     |        |
| 90  | Xinjiang, China[Uyghur] | 13    | 13      | 30       | 23     | 10     | 14     | 13     | 15,16    | 13     | 12     | 13     | 19     | 15     | 16     | 22     | 12 | 20      | 19     | 25     | 11     | 11     | 11     | 10     | 30     | 12     |        |
| 91  | Xinjiang, China[Uyghur] | 15    | 13      | 29       | 22     | 10     | 13     | 14     | 10,21    | 14     | 13     | 12     | 18     | 14     | 19     | 20     | 12 | 19      | 17     | 22     | 11     | 12     | 12     | 11     | 32     | 12     |        |
| 92  | Xinjiang, China[Uyghur] | 14    | 14      | 31       | 23     | 11     | 14     | 12     | 11,12    | 14     | 10     | 10     | 18     | 14     | 18     | 20     | 11 | 17      | 18     | 21     | 12     | 12     | 12     | 10     | 32     | 12     |        |
| 93  | Xinjiang, China[Uyghur] | 13    | 13      | 30       | 23     | 10     | 14     | 13     | 15,16    | 13     | 12     | 13     | 19     | 15     | 15     | 22     | 11 | 20      | 18     | 25     | 11     | 11     | 11     | 10     | 30     | 12     |        |
| 94  | Xinjiang, China[Uyghur] | 17    | 12      | 28       | 24     | 10     | 13     | 13     | 14,20    | 15     | 10     | 12     | 20     | 15     | 17     | 21     | 12 | 18      | 18     | 21     | 11     | 13     | 11     | 11     | 32     | 13     |        |
| 95  | Xinjiang, China[Uyghur] | 15    | 14      | 30       | 25     | 10     | 7      | 13     | 11       | 14     | 11     | 12     | 19     | 16     | 16     | 22     | 11 | 18      | 20     | 25     | 11     | 14     | 10     | 11     | 31     | 12     |        |
| 96  | Xinjiang, China[Uyghur] | 17    | 13      | 29       | 25     | 10     | 11     | 13     | 12       | 14     | 10     | 10     | 22     | 15     | 18     | 21     | 11 | 17      | 16     | 25     | 12     | 12     | 10     | 10     | 27     | 14     |        |
| 97  | Xinjiang, China[Uyghur] | 15    | 13      | 30       | 24     | 11     | 13     | 13     | 13,24    | 15     | 10     | 11     | 20     | 15     | 15     | 20     | 11 | 17      | 19     | 24     | 11     | 13     | 12     | 9      | 31     | 12     |        |
| 98  | Xinjiang, China[Uyghur] | 14    | 13      | 28       | 24     | 10     | 14     | 12     | 12,13    | 15     | 11     | 11     | 20     | 16     | 15     | 21     | 12 | 19      | 18     | 23     | 11     | 13     | 11     | 10     | 34.1   | 10     |        |
| 99  | Xinjiang, China[Uyghur] | 15    | 14      | 30       | 22     | 10     | 11     | 12     | 14,16    | 14     | 9      | 11     | 19     | 17     | 15     | 20     | 21 | 11      | 13     | 18     | 23     | 12     | 12     | 9      | 11     | 31     | 12     |
| 100 | Xinjiang, China[Uyghur] | 14    | 13      | 29       | 24     | 10     | 11     | 12     | 13,16    | 15     | 10     | 11     | 19     | 15     | 20     | 21     | 11 | 20      | 18     | 23     | 12     | 12     | 14     | 10     | 10     | 30     | 14     |

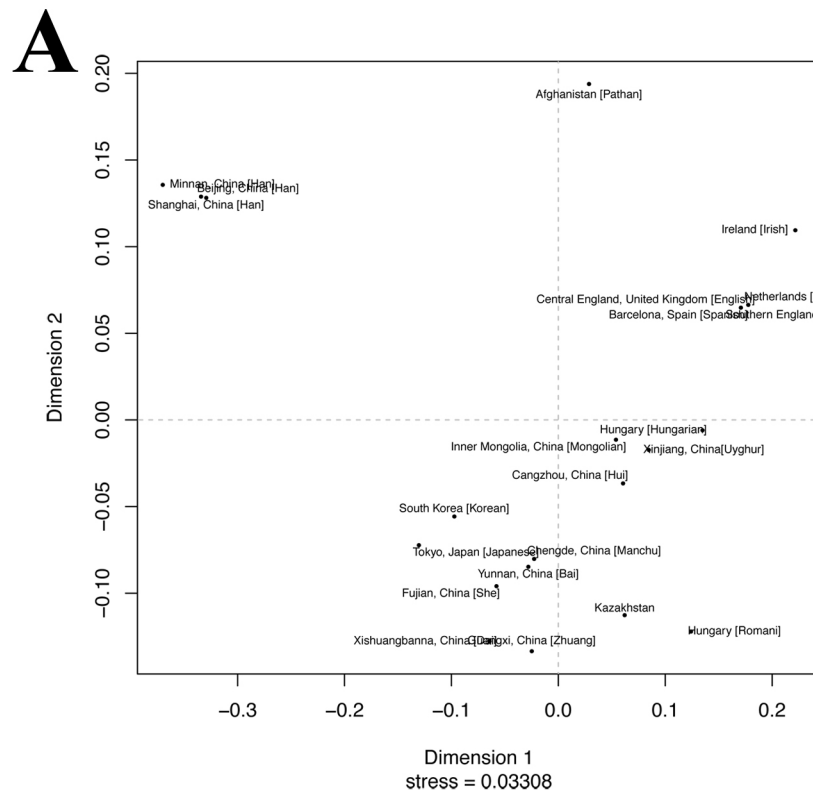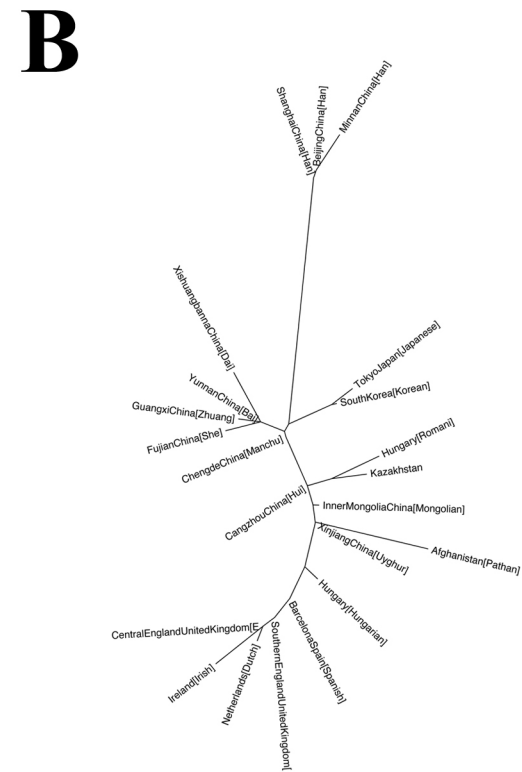

**Supplementary Figure S1. MDS plot and neighbour-joining phylogenetic tree.** A, MDS plot of the Uyghur population and 21 different European, Central Asian or Eastern Asian populations based on  $R_{ST}$ . B, Neighbour-joining phylogenetic tree of the Uyghur population and the European, Central Asian and Eastern Asian populations based on a distance matrix of  $R_{ST}$ .
